# Supplementary material
Source: Springer Nature journal article supplement (https://www.springermedizin.de/resource/supplementary/12936_2012_2158_MOESM1_ESM.pdf/9542504)
Supplement: MOESM1 [file 9542504]

Risk factors for anaemia

In *P. falciparum*-infected subjects: young age, splenomegaly, chronic infection, recrudescence [70,71]

**Anaemia or decreased haemoglobin**

In *P. vivax*-infected subjects: young age, splenomegaly, chronic infection, repeated attacks [27,72]

Key data on major processes

In *P. falciparum* malaria: 8 uninfected RBC lost for 1 infected RBC in peripheral blood [67,70]

**Red blood cell loss**

In *P. vivax* malaria: 34 uninfected RBC lost for 1 infected RBC in peripheral blood [73]

In *P. falciparum* malaria: reticulocytes not high enough for level of anaemia [71]

**Impaired red blood cell production**

In *P. vivax* malaria: reticulocytes low during the first 10 days then appropriately increased during 3–6 weeks [60,61]

**Intravascular haemolysis**  
RBC breaks in the bloodstream before being phagocytosed

**Extravascular haemolysis**  
RBC phagocytosed as intact cell

**Dyserythropoiesis**  
Progenitors proliferate but do not exit from the bone marrow

**Bone marrow insufficiency**  
Progenitors do not proliferate enough

Low haptoglobin & haemopexin  
High LDH &  $\alpha$ -HBDH [71]

High annexin V & neopterin  
Low CD35 & CD55 [71]

Nuclear abnormalities of erythroblasts more frequent in children with chronic infection [66,68,69]

Decreased cellularity at acute stage in 3/11 adults [77]

*In vitro* phagocytosis of uninfected RBC [71]

0.23-15.1% of erythroblasts with marked nuclear abnormalities in 6 of 9 adults with acute infection [76]

Rare observations of parasitized erythroblasts [78,79]. Not seen in 9 adults [76]

Accumulation & phagocytosis of infected & uninfected RBC in the spleen [74] & bone marrow [66]

Phagocytosis of erythroblasts (also in falciparum malaria) [69]

No data in children or in severe anaemia. Proportion of erythroblasts normal or increased in 8 of 9 adults with acute infection [76]

Phagocytosis of infected & uninfected RBC in the spleen [75] & bone marrow [76]

Rupture of sequestered schizonts [80]

Rupture of circulating schizonts including parasite-harbouring reticulocytes [63,64]. Intravascular haemolysis due to rupture of schizonts lower in *P. vivax* than in *P. falciparum* as parasitaemia is lower in *P. vivax* [9]

Rupture of uninfected RBC (increased fragility) [81]

Mechanical retention of uninfected RBC in the spleen due to decreased deformability [82,83]

Mechanical retention of rings in the spleen due to decreased deformability [84-87]

Phagocytosis & opsonization of uninfected RBC decorated with RSP-2/RAP-2 [88], complement [89-91], immunoglobulins [92] or low levels of CD55 [104]

Oxidative stress on uninfected RBC & infected RBC [93] (also in falciparum malaria) [94,95]

Increased osmotic fragility & Heinz body formation of uninfected RBC [72]

Macrophage activation by cytokines or parasite products enhancing phagocytosis of progenitors (including erythroblasts) [69] although cytokine levels are generally lower in severe malarial anaemia than in cerebral or uncomplicated attacks [96,97]

Toxic effect of parasite products (eg haemozoin) on progenitors (including erythroblasts) (also in falciparum malaria) [69]

RAP-2 on the surface of erythroblasts & phagocytosis in vitro [98]

Impaired iron utilization (also in falciparum malaria) [99]

Inappropriate bone marrow response to appropriate EPO levels in children [100,101] though possibly not in adults [102,103]

Markers of processes

Identified or suspected cellular mechanisms
